# Supplementary material for: Can self-propelled objects escape from compression stimulation?
Source: Royal Society of Chemistry journal article supplement (doi:10.1039/d4sm00288a), 2024-01-01
Supplement: d4sm00288a1.pdf [file d4sm00288a1.pdf]

## Electronic Supplementary Information

Can self-propelled objects escape from compression stimulation?

Masaki Yoshikai,<sup>a</sup> Muneyuki Matsuo,<sup>ab</sup> Nobuhiko J. Suematsu,<sup>cd</sup> Hiraku Nishimori<sup>cd</sup> and Satoshi Nakata<sup>\*a</sup>

<sup>a</sup>*Graduate School of Science, Hiroshima University, 1-3-1 Kagamiyama, Higashi-Hiroshima, Hiroshima 739-8526, Japan. Email: nakatas@hiroshima-u.ac.jp*

<sup>b</sup>*Graduate School of Arts and Sciences, The University of Tokyo, 3-8-1 Komaba, Meguro, Tokyo 153-8902, Japan.*

<sup>c</sup>*Meiji Institute for Advanced Study of Mathematical Sciences (MIMS), Meiji University, 4-21-1 Nakano, Nakano-ku, Tokyo 164-8525, Japan.*

<sup>d</sup>*Graduate School of Advanced Mathematical Sciences, Meiji University, 4-21-1 Nakano, Nakano-ku, Tokyo 164-8525, Japan.*

\*To whom correspondence should be addressed. Tel. & fax: +81-824-24-7409

E-mail: [nakatas@hiroshima-u.ac.jp](mailto:nakatas@hiroshima-u.ac.jp)

## 1. Movies on self-propulsion of eight CPs and eight MCPs corresponding to Figure 2

Movie S1 corresponding to Figure 2a: Top view, real time of speed

Movie S2 corresponding to Figure 2b: Top view, real time of speed

## 2. Snapshots for CPs at $t = 11$ s and MCPs at $t = 19.5$ s

We added snapshots for CPs at  $t = 11$  s and MCPs at  $t = 19.5$  s.

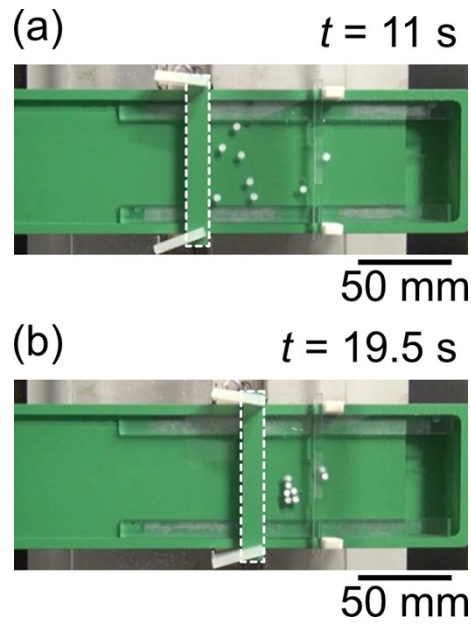

**Figure S1.** Snapshots of (a) eight CPs at  $t = 11$  s and (b) eight MCPs at  $t = 19.5$  s under a decrease in the surface area of  $C_{in}$  at  $W_g = 25$  mm.

### 3. The time ( $t_1$ ) when the first CP or MCP escaped to $C_{out}$ .

We added a table (Tables S1) on the time ( $t_1$ ) when the first CP or MCP escaped to  $C_{out}$  obtained from Figure 3-1 or 3-2.

**Table S1.** The time ( $t_1$ ) when the first CP and MCP escaped to  $C_{out}$ .

|      | $W_g / \text{mm}$ | $t_1 / \text{s}$  |
|------|-------------------|-------------------|
| CPs  | 5                 | $14.5 \pm 3.0$    |
|      | 25                | $4.30 \pm 3.84$   |
|      | 40                | $0.506 \pm 0.947$ |
| MCPs | 5                 |                   |
|      | 25                | $13.9 \pm 4.63$   |
|      | 40                | $4.13 \pm 3.08$   |

#### 4. Relationship between $-(A_{\text{in}}/2)\ln(1-2N_{\text{out}}(t)/N_{\text{total}})$ and $t$ for different values of $W_g$ at $A_{\text{in}} = A_{\text{out}}$ and 8 CPs

The relationship between  $-(A_{\text{in}}/2)\ln(1-2N_{\text{out}}(t)/N_{\text{total}})$  and  $t$  was analyzed to estimate the value of  $a$  for different values of  $W_g$  based on eqn (4). Here, eight CPs were floated on  $C_{\text{in}}$  as the initial condition and  $A_{\text{in}} = A_{\text{out}} = 3920 \text{ mm}^2$ , as indicated in Figure S2a. The relaxation time ( $t_e$ ) is the time from the initial value of  $N_{\text{out}} (= 8)$  at  $A = A_{\text{in-i}}$  to reach the value under the equilibrium at  $A_{\text{in}} = A_{\text{in-f}}$ , i.e.,  $N_{\text{out}} = 8 \times A_{\text{out}}/(A_{\text{in-f}} + A_{\text{out}}) = 8 \times 0.7407 \sim 6$ .  $a_0$  was estimated from the relationship between  $a$  and  $W_g$  based on eqn (5), as shown in Figure S2b.

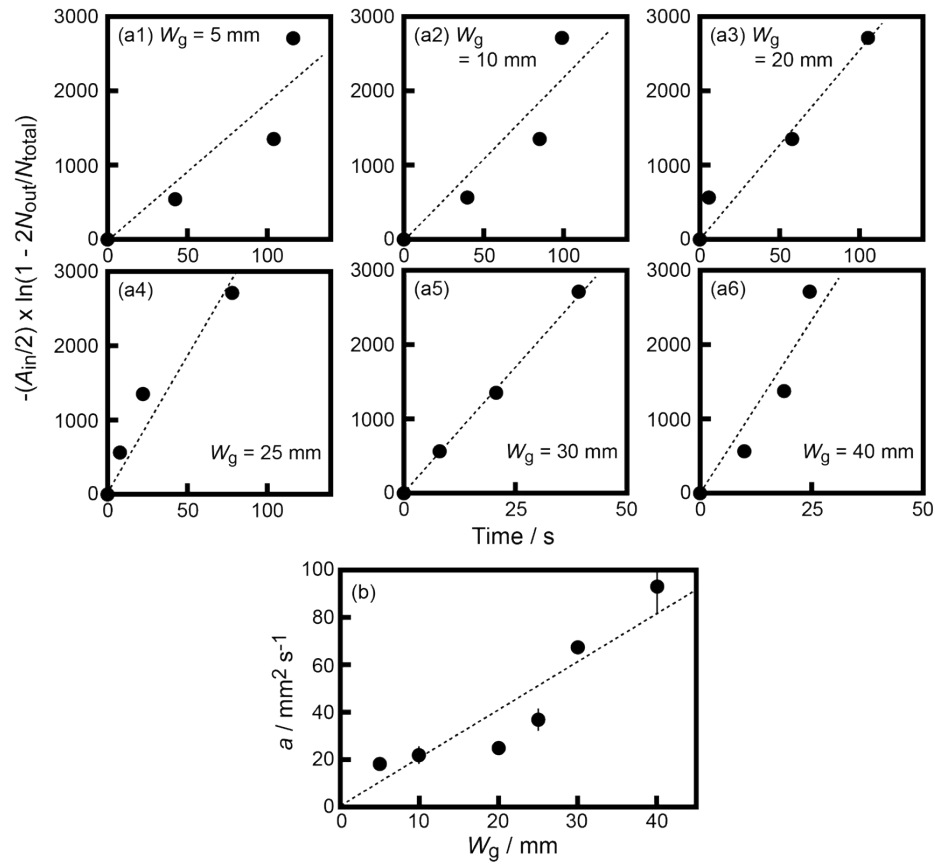

**Figure S2.** (a) Relationship between  $-(A_{\text{in}}/2)\ln(1-2N_{\text{out}}(t)/N_{\text{total}})$  and  $t$  for different values of  $W_g$  (= (a1) 5, (a2) 10, (a3) 20, (a4) 25, (a5) 30, and (a6) 40 mm) at  $A_{\text{in}} = A_{\text{out}} = 3920 \text{ mm}^2$  and eight CPs. (b) Relationship between  $a$  and  $W_g$ . The values of  $a$  at different  $W_g$  were obtained from (a). The dotted lines in (a) and (b) were obtained from linear approximation of the experimental results.

### 5. Relationship between $\Delta\gamma$ and $A_{in-i} - A_{in}$ for eight CPs to estimate $b_0$ and $b_1$ in eqn (6)

The relationship between  $\Delta\gamma$  and  $A_{in-i} - A_{in}$  for eight CPs was analyzed to estimate  $b_0$  and  $b_1$  in eqn (6) based on the experimental results in Figure 5, as indicate in Figure S3.

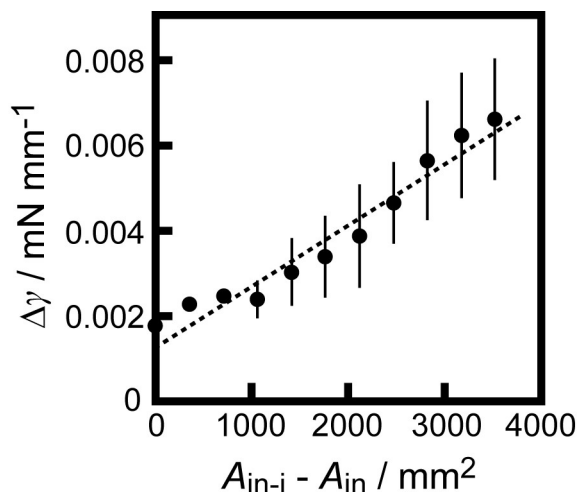

**Figure S3.** (a) Relationship between  $\Delta\gamma$  and  $A_{in-i} - A_{in}$  for eight CPs. The values of  $\Delta\gamma$  correspond to those in Figure 5. The dotted line was obtained from linear approximation of the experimental results.

### 6. Relationship between $c_0$ and $W_g$ to estimate $c_0$

$c_0$  for CPs was individually obtained from eqn (7) at  $t = 0$  for each  $W_g$ , as indicated in Figure S4. The average values of  $c_0$  were  $844 \pm 287$ .

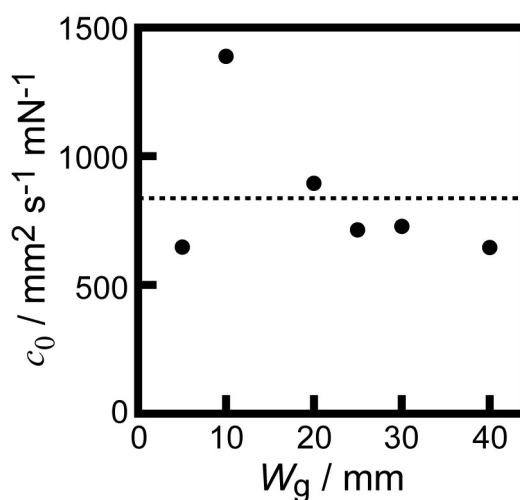

**Figure S4.** Relationship between  $c_0$ , as a function of  $W_g$  for eight CPs and  $W_g$ . The dotted line was the average value of  $c_0$ .
